# Supplementary material
Source: PubMed Central journal article supplement (PMC404145)

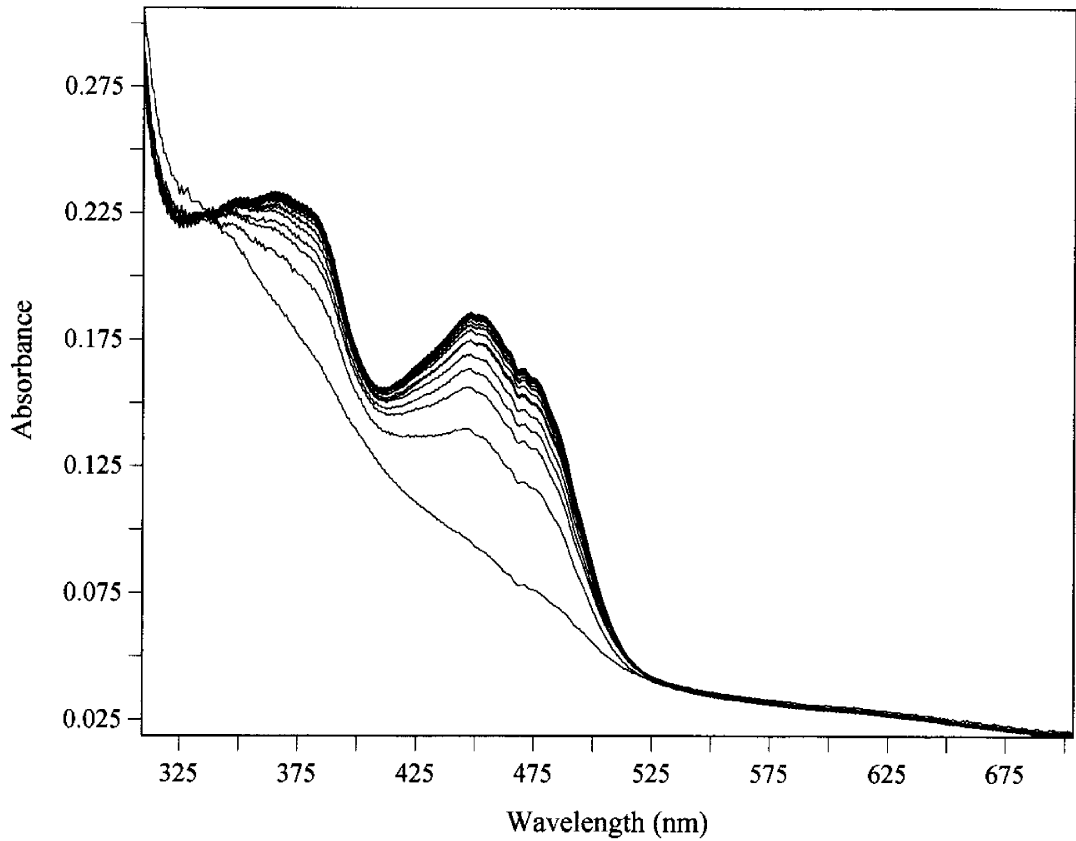

Supplement: pnas_252644599_2.pdf [file pnas_252644599_2.pdf]

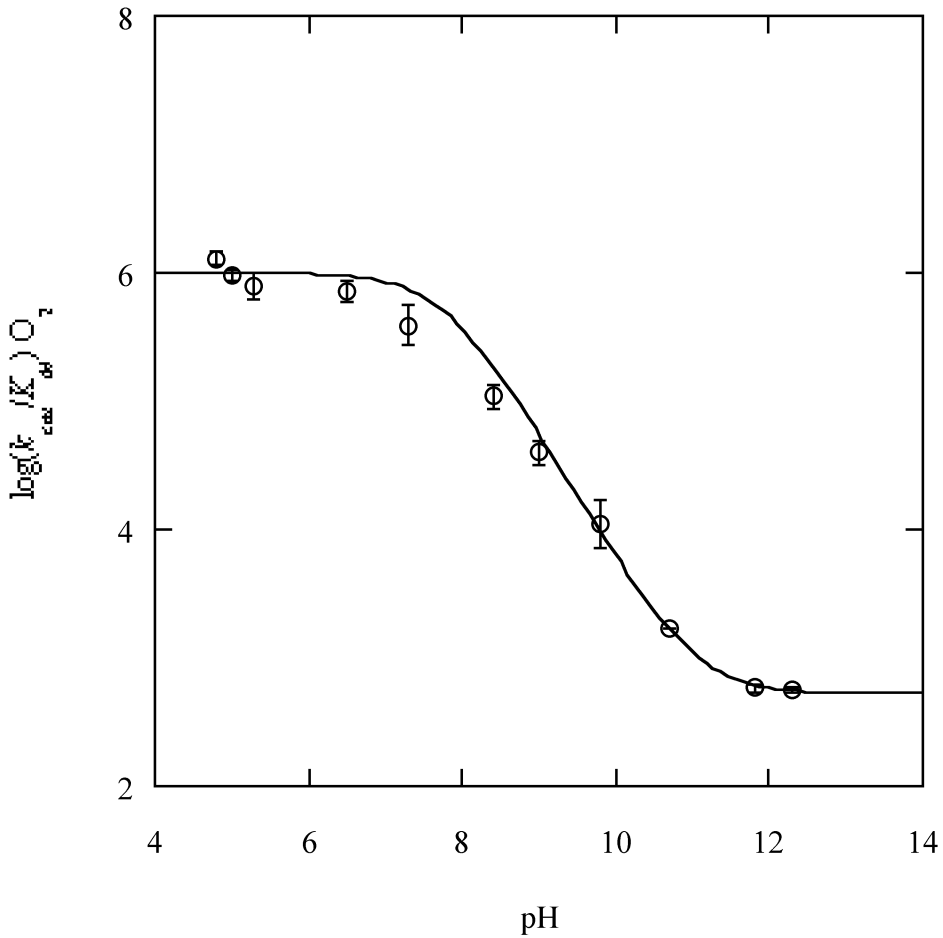

Supplement: pnas_252644599_4.pdf [file pnas_252644599_4.pdf]

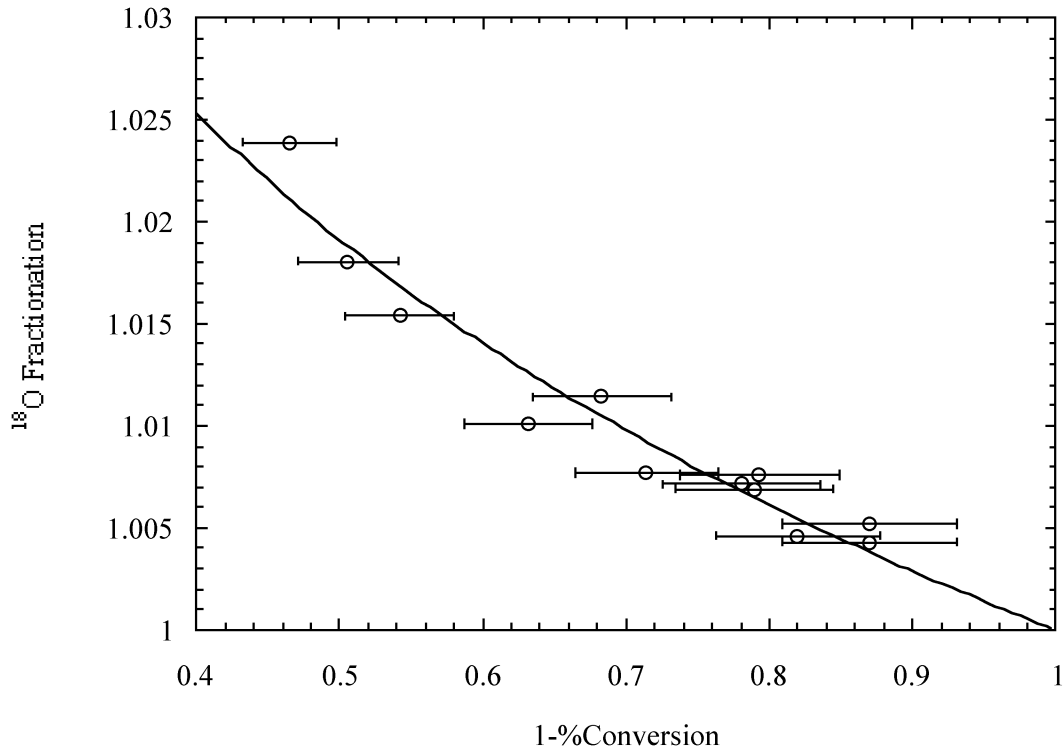

Supplement: pnas_252644599_6.pdf [file pnas_252644599_6.pdf]

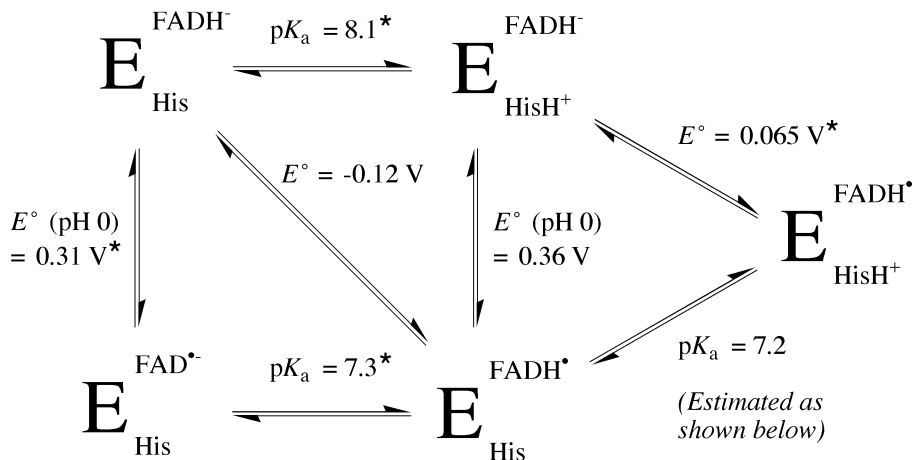

\* From Experimental data

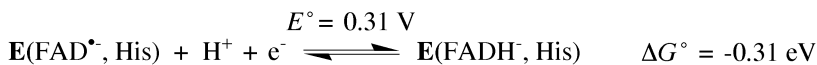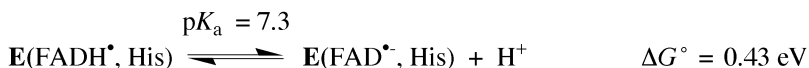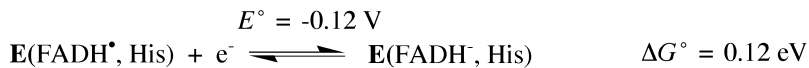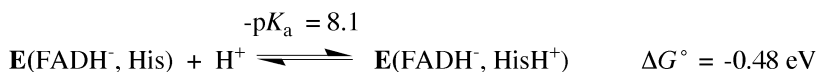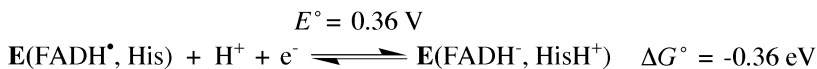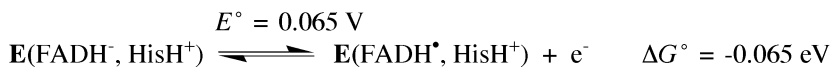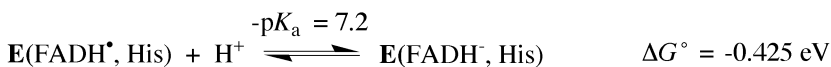

Supplement: pnas_252644599_8.pdf [file pnas_252644599_8.pdf]
